# Supplementary material
Source: PubMed Central journal article supplement (PMC8201834)
Supplement: pnas.2021793118.sapp.pdf [file pnas.2021793118.sapp.pdf]

## **SUPPORTING INFORMATION**

### **Collectivism Predicts Mask Use During COVID-19**

**Authors:** Jackson G. Lu<sup>1\*</sup>, Peter Jin<sup>1</sup>, Alexander S. English<sup>2</sup>

**Affiliations:**

<sup>1</sup> Sloan School of Management, Massachusetts Institute of Technology, Cambridge, MA, USA 02142

<sup>2</sup> Department of Psychology and Behavioral Sciences, Zhejiang University, China 310027

**Figure S1**  
**Study 1a: Mask Usage in all 3,141 US Counties**

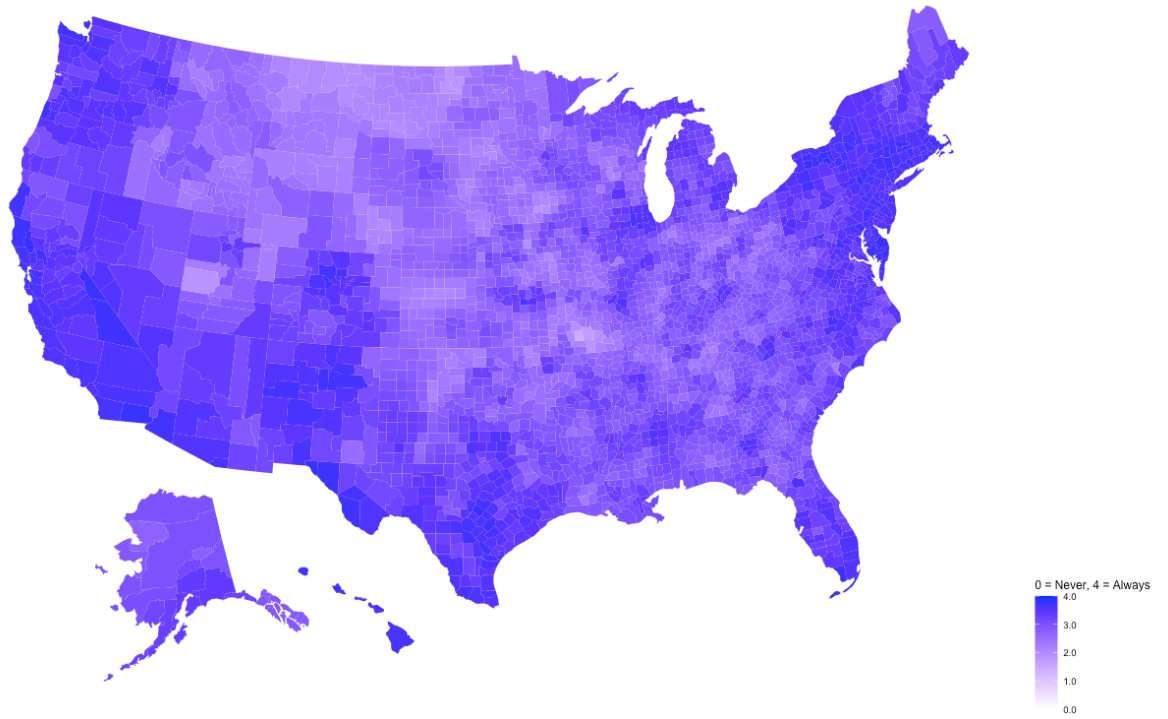

*Note.* Mask usage based on a survey conducted by *The New York Times* and Dynata from July 2 to July 14, 2020.

**Figure S2**  
**Study 3. Facebook Survey Interface**

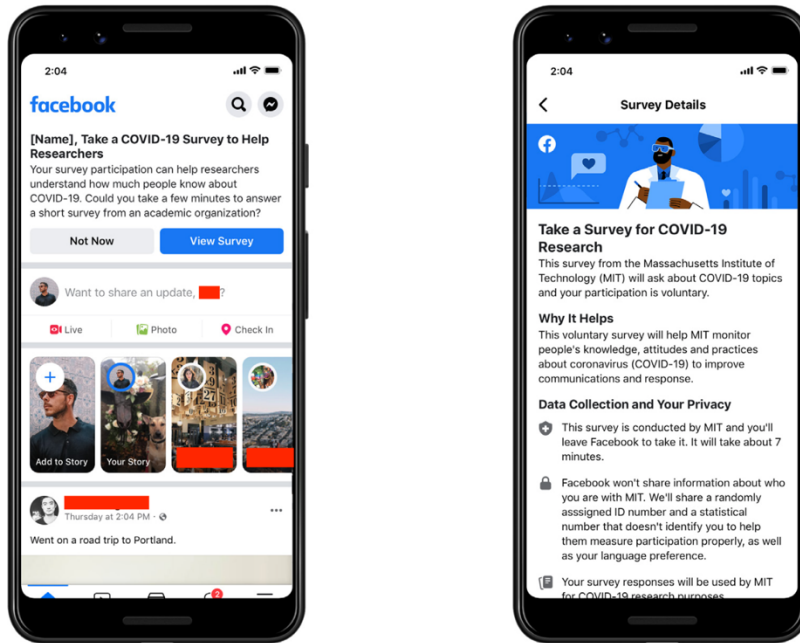

*Source:* [https://dataforgood.fb.com/wp-content/uploads/2020/07/COVID-19-Preventive-Health-Survey\\_Overview.pdf](https://dataforgood.fb.com/wp-content/uploads/2020/07/COVID-19-Preventive-Health-Survey_Overview.pdf)

**Figure S3**  
**Study 3. Percentage of Respondents who Reported Wearing Masks in 67 Countries and Territories**

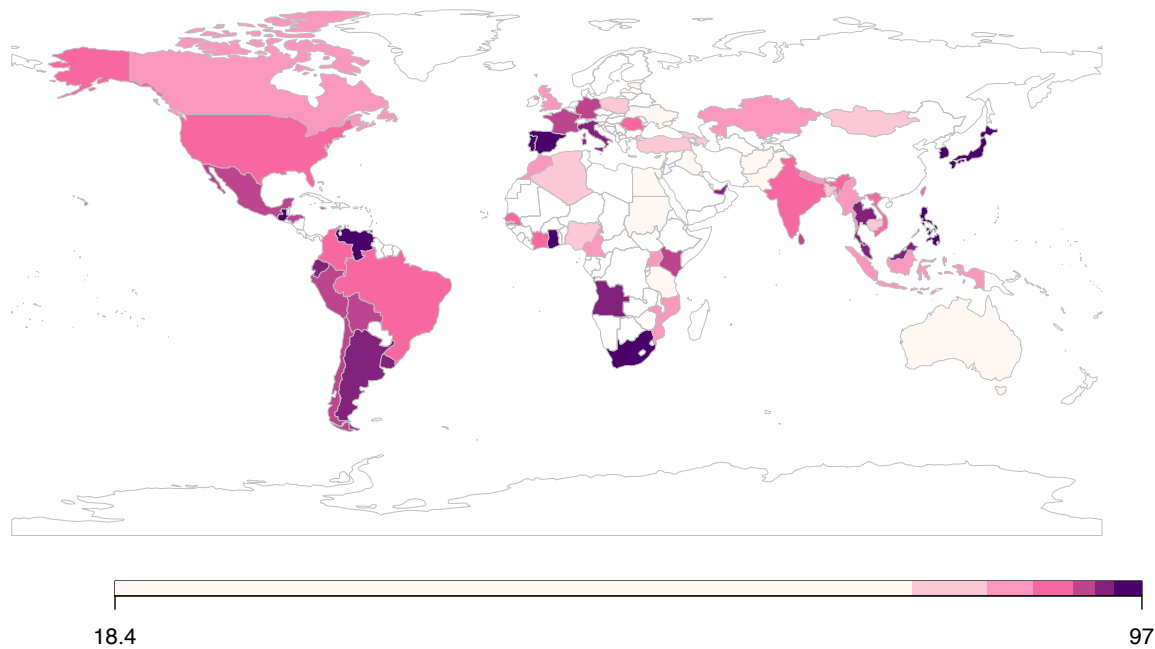

**Table S1. Variable Sources**

| <b>Variables</b>           | <b>Level</b> | <b>Year</b>                | <b>Source</b>                                                                                                                                                                                                                                                                                                                                                                                                                                                                                                                                                 |
|----------------------------|--------------|----------------------------|---------------------------------------------------------------------------------------------------------------------------------------------------------------------------------------------------------------------------------------------------------------------------------------------------------------------------------------------------------------------------------------------------------------------------------------------------------------------------------------------------------------------------------------------------------------|
| Collectivism               | US state     |                            | Vandello & Cohen (1999)                                                                                                                                                                                                                                                                                                                                                                                                                                                                                                                                       |
| Collectivism               | Country      |                            | Composite of Hofstede's index and the GLOBE in-group collectivism index                                                                                                                                                                                                                                                                                                                                                                                                                                                                                       |
| Tightness                  | US state     |                            | Harrington & Gelfand (2014)                                                                                                                                                                                                                                                                                                                                                                                                                                                                                                                                   |
| Tightness                  | Country      |                            | Uz (2015)                                                                                                                                                                                                                                                                                                                                                                                                                                                                                                                                                     |
| Median age                 | US county    | 2019                       | <a href="https://www2.census.gov/programs-surveys/popest/datasets/2010-2019/counties/asrh/">https://www2.census.gov/programs-surveys/popest/datasets/2010-2019/counties/asrh/</a>                                                                                                                                                                                                                                                                                                                                                                             |
| Median age                 | US state     | 2019                       | <a href="https://www.census.gov/data/tables/time-series/demo/popest/2010s-state-detail.html">https://www.census.gov/data/tables/time-series/demo/popest/2010s-state-detail.html</a><br>Annual Estimates of the Resident Population for Selected Age Groups by Sex: April 1, 2010 to July 1, 2019                                                                                                                                                                                                                                                              |
| Median age                 | Country      | 2020                       | <a href="https://population.un.org/wpp/Download/Standard/Population/Median%20Age%20of%20Population">https://population.un.org/wpp/Download/Standard/Population/Median Age of Population</a>                                                                                                                                                                                                                                                                                                                                                                   |
| % Male                     | US county    | 2019                       | <a href="https://www2.census.gov/programs-surveys/popest/datasets/2010-2019/counties/asrh/">https://www2.census.gov/programs-surveys/popest/datasets/2010-2019/counties/asrh/</a>                                                                                                                                                                                                                                                                                                                                                                             |
| % Male                     | US state     | 2019                       | <a href="https://www.census.gov/data/tables/time-series/demo/popest/2010s-state-detail.html">https://www.census.gov/data/tables/time-series/demo/popest/2010s-state-detail.html</a><br>Annual Estimates of the Resident Population for Selected Age Groups by Sex: April 1, 2010 to July 1, 2019                                                                                                                                                                                                                                                              |
| % Male                     | Country      | 2019                       | <a href="https://data.worldbank.org/indicator/SP.POP.TOTL.FE.ZS">https://data.worldbank.org/indicator/SP.POP.TOTL.FE.ZS</a>                                                                                                                                                                                                                                                                                                                                                                                                                                   |
| % college educated or more | US county    | 2014-2018                  | <a href="https://www.ers.usda.gov/data-products/county-level-data-sets/download-data">https://www.ers.usda.gov/data-products/county-level-data-sets/download-data</a><br>Educational attainment for the U.S., States, and counties, 1970-2018                                                                                                                                                                                                                                                                                                                 |
| % college educated or more | US state     | 2019                       | <a href="https://data.census.gov/cedsci/table?q=Educational%20Attainment%20in%20the%20United%20States&amp;t=Educational%20Attainment&amp;g=0100000US.04000.001&amp;tid=ACSS1Y2019.S1501&amp;tp=true&amp;hidePreview=true">https://data.census.gov/cedsci/table?q=Educational%20Attainment%20in%20the%20United%20States&amp;t=Educational%20Attainment&amp;g=0100000US.04000.001&amp;tid=ACSS1Y2019.S1501&amp;tp=true&amp;hidePreview=true</a>                                                                                                                 |
| Population density         | US county    | 2019                       | Population density = Population / Land area<br>Population (2019): <a href="https://www.census.gov/data/datasets/time-series/demo/popest/2010s-counties-total.html">https://www.census.gov/data/datasets/time-series/demo/popest/2010s-counties-total.html</a><br>Annual Estimates of the Resident Population for Counties: April 1, 2010 to July 1, 2019<br>Land area:<br><a href="https://www.census.gov/library/publications/2011/compendia/usa-counties-2011.html">https://www.census.gov/library/publications/2011/compendia/usa-counties-2011.html</a> . |
| Population density         | US state     | 2010                       | <a href="https://www.census.gov/quickfacts/geo/chart/US/POP060210">https://www.census.gov/quickfacts/geo/chart/US/POP060210</a>                                                                                                                                                                                                                                                                                                                                                                                                                               |
| Population density         | Country      | 2020                       | <a href="https://population.un.org/wpp/Download/Standard/Population/Population%20Density">https://population.un.org/wpp/Download/Standard/Population/Population Density</a>                                                                                                                                                                                                                                                                                                                                                                                   |
| Income per capita          | US county    | 2019                       | <a href="https://www.bea.gov/data/income-saving/personal-income-county-metro-and-other-areas">https://www.bea.gov/data/income-saving/personal-income-county-metro-and-other-areas</a>                                                                                                                                                                                                                                                                                                                                                                         |
| Income per capita          | US state     | 2019                       | <a href="https://www.bea.gov/data/income-saving/personal-income-by-state">https://www.bea.gov/data/income-saving/personal-income-by-state</a>                                                                                                                                                                                                                                                                                                                                                                                                                 |
| GDP per capita             | Country      | Most recent year available | <a href="https://github.com/owid/covid-19-data/blob/master/public/data/owid-covid-data.csv">https://github.com/owid/covid-19-data/blob/master/public/data/owid-covid-data.csv</a>                                                                                                                                                                                                                                                                                                                                                                             |
| Universal health coverage  | Country      | 2017                       | <a href="https://apps.who.int/gho/data/view.main.INDEXOFESSENTIALSERVICECOVERAGEv?lang=en">https://apps.who.int/gho/data/view.main.INDEXOFESSENTIALSERVICECOVERAGEv?lang=en</a>                                                                                                                                                                                                                                                                                                                                                                               |

|                       |           |      |                                                                                                                                                                                             |
|-----------------------|-----------|------|---------------------------------------------------------------------------------------------------------------------------------------------------------------------------------------------|
|                       |           |      | UHC index of service coverage                                                                                                                                                               |
| COVID-19 severity     | US county | 2020 | <a href="https://github.com/nytimes/covid-19-data/blob/master/us-counties.csv">https://github.com/nytimes/covid-19-data/blob/master/us-counties.csv</a>                                     |
| COVID-19 severity     | US state  | 2020 | <a href="https://github.com/OxCGRT/covid-policy-tracker/blob/master/data/OxCGRT_latest.csv">https://github.com/OxCGRT/covid-policy-tracker/blob/master/data/OxCGRT_latest.csv</a>           |
| COVID-19 severity     | Country   | 2020 | <a href="https://github.com/owid/covid-19-data/blob/master/public/data/owid-covid-data.csv">https://github.com/owid/covid-19-data/blob/master/public/data/owid-covid-data.csv</a>           |
| Government stringency | US state  | 2020 | <a href="https://github.com/OxCGRT/covid-policy-tracker/blob/master/data/OxCGRT_latest.csv">https://github.com/OxCGRT/covid-policy-tracker/blob/master/data/OxCGRT_latest.csv</a>           |
| Government stringency | Country   | 2020 | <a href="https://github.com/owid/covid-19-data/blob/master/public/data/owid-covid-data.csv">https://github.com/owid/covid-19-data/blob/master/public/data/owid-covid-data.csv</a>           |
| Political affiliation | US state  | 2014 | <a href="https://www.pewforum.org/religious-landscape-study/compare/party-affiliation/by/state/">https://www.pewforum.org/religious-landscape-study/compare/party-affiliation/by/state/</a> |

**Table S2**  
**Study 1a. Descriptive Statistics of the 50 US States**

| State          | State abbreviation | Collectivism | Mean mask usage |
|----------------|--------------------|--------------|-----------------|
| Alabama        | AL                 | 57           | 2.92            |
| Alaska         | AK                 | 48           | 3.08            |
| Arizona        | AZ                 | 49           | 3.30            |
| Arkansas       | AR                 | 54           | 2.88            |
| California     | CA                 | 60           | 3.49            |
| Colorado       | CO                 | 36           | 3.19            |
| Connecticut    | CT                 | 50           | 3.63            |
| Delaware       | DE                 | 55           | 3.69            |
| Florida        | FL                 | 54           | 3.19            |
| Georgia        | GA                 | 60           | 2.98            |
| Hawaii         | HI                 | 91           | 3.70            |
| Idaho          | ID                 | 42           | 2.64            |
| Illinois       | IL                 | 52           | 3.02            |
| Indiana        | IN                 | 57           | 2.87            |
| Iowa           | IA                 | 39           | 2.68            |
| Kansas         | KS                 | 38           | 2.66            |
| Kentucky       | KY                 | 53           | 2.93            |
| Louisiana      | LA                 | 72           | 3.02            |
| Maine          | ME                 | 45           | 3.23            |
| Maryland       | MD                 | 63           | 3.58            |
| Massachusetts  | MA                 | 46           | 3.67            |
| Michigan       | MI                 | 46           | 3.22            |
| Minnesota      | MN                 | 41           | 2.67            |
| Mississippi    | MS                 | 64           | 3.03            |
| Missouri       | MO                 | 46           | 2.57            |
| Montana        | MT                 | 31           | 2.38            |
| Nebraska       | NE                 | 35           | 2.60            |
| Nevada         | NV                 | 52           | 3.35            |
| New Hampshire  | NH                 | 43           | 3.27            |
| New Jersey     | NJ                 | 59           | 3.59            |
| New Mexico     | NM                 | 51           | 3.37            |
| New York       | NY                 | 53           | 3.61            |
| North Carolina | NC                 | 56           | 3.25            |
| North Dakota   | ND                 | 37           | 2.24            |
| Ohio           | OH                 | 45           | 2.81            |
| Oklahoma       | OK                 | 42           | 2.68            |
| Oregon         | OR                 | 33           | 3.35            |
| Pennsylvania   | PA                 | 52           | 3.41            |
| Rhode Island   | RI                 | 48           | 3.71            |
| South Carolina | SC                 | 70           | 2.99            |
| South Dakota   | SD                 | 36           | 2.54            |
| Tennessee      | TN                 | 56           | 2.74            |
| Texas          | TX                 | 58           | 3.23            |
| Utah           | UT                 | 61           | 2.83            |
| Vermont        | VT                 | 42           | 3.28            |
| Virginia       | VA                 | 60           | 3.32            |
| Washington     | WA                 | 37           | 3.41            |
| West Virginia  | WV                 | 48           | 2.93            |
| Wisconsin      | WI                 | 46           | 2.82            |
| Wyoming        | WY                 | 35           | 2.44            |

*Note.* The collectivism-individualism scores are sourced from Vandello and Cohen (1999).

Mask usage question: "How often do you wear a mask in public when you expect to be within six feet of another person?" (0 = never, 1 = rarely, 2 = sometimes, 3 = frequently, 4 = always).

**Table S3**  
**Study 1a. US State-Level Descriptive Statistics and Correlations**

| Variables                    | <i>M</i> | <i>SD</i> | 1    | 2    | 3    | 4    | 5    | 6    | 7    | 8    | 9   | 10  |
|------------------------------|----------|-----------|------|------|------|------|------|------|------|------|-----|-----|
| 1. Mask usage                | 3.08     | 0.38      |      |      |      |      |      |      |      |      |     |     |
| 2. Collectivism              | 50.08    | 11.34     | .44  |      |      |      |      |      |      |      |     |     |
| 3. Tightness                 | 50.14    | 12.60     | -.46 | .23  |      |      |      |      |      |      |     |     |
| 4. % Republican              | 0.40     | 0.08      | -.85 | -.24 | .59  |      |      |      |      |      |     |     |
| 5. Government stringency     | 60.78    | 8.85      | .55  | .24  | -.29 | -.46 |      |      |      |      |     |     |
| 6. COVID-19 severity         | 125.59   | 105.78    | -.13 | .32  | .44  | .28  | -.05 |      |      |      |     |     |
| 7. Median age                | 38.83    | 2.30      | .35  | -.03 | -.23 | -.43 | .31  | -.24 |      |      |     |     |
| 8. % Male                    | 0.49     | 0.01      | -.44 | -.43 | -.29 | .37  | -.30 | -.18 | -.48 |      |     |     |
| 9. % College degree or above | 0.30     | 0.05      | .48  | -.12 | -.60 | -.55 | .26  | -.45 | .15  | -.10 |     |     |
| 10. Population density       | 194.96   | 261.09    | .62  | .24  | -.26 | -.58 | .29  | -.23 | .29  | -.50 | .54 |     |
| 11. Income per capita (US\$) | 54234.50 | 8632.47   | .46  | -.11 | -.63 | -.52 | .17  | -.49 | .07  | .09  | .82 | .57 |



**Table S4**  
**Study 1a. US County-Level Descriptive Statistics and Correlations**

| Variables                    | <i>M</i> | <i>SD</i> | 1    | 2    | 3    | 4    | 5   | 6   |
|------------------------------|----------|-----------|------|------|------|------|-----|-----|
| 1. Mask usage                | 2.98     | 0.41      |      |      |      |      |     |     |
| 2. COVID-19 severity         | 115.61   | 144.91    | .11  |      |      |      |     |     |
| 3. Median age                | 41.75    | 5.41      | -.06 | -.26 |      |      |     |     |
| 4. % Male                    | 0.50     | 0.02      | -.09 | -.01 | -.03 |      |     |     |
| 5. % College degree or above | 21.57    | 9.43      | .35  | -.10 | -.15 | -.18 |     |     |
| 6. Population density        | 272.86   | 1786.36   | .16  | .01  | -.11 | -.09 | .25 |     |
| 7. Income per capita (US\$)  | 44117.17 | 12727.53  | .19  | -.08 | .03  | -.10 | .67 | .28 |

**Table S5**  
**Study 1a. OLS Regressions Predicting Mask Usage at US State Level**

|                           | <b>Model 1</b>                   | <b>Model 2</b>                    | <b>Model 3</b>                  |
|---------------------------|----------------------------------|-----------------------------------|---------------------------------|
| Intercept                 | 2.341***<br>(0.226)              | 1.069<br>(3.747)                  | 1.169<br>(4.508)                |
| <b>Collectivism</b>       | <b>0.015**</b><br><b>(0.004)</b> | <b>0.016***</b><br><b>(0.004)</b> | <b>0.007*</b><br><b>(0.003)</b> |
| Median age                |                                  | 0.043*<br>(0.020)                 | -0.0004<br>(0.016)              |
| % Male                    |                                  | -3.180<br>(6.366)                 | -1.143<br>(8.173)               |
| % College degree or above |                                  | 3.788***<br>(0.776)               | 0.241<br>(1.072)                |
| COVID-19 severity         |                                  |                                   | 0.0002<br>(0.0003)              |
| Government stringency     |                                  |                                   | 0.007†<br>(0.004)               |
| Population density (log)  |                                  |                                   | 0.017<br>(0.049)                |
| Income per capita (log)   |                                  |                                   | 0.256<br>(0.373)                |
| % Republican              |                                  |                                   | -3.167***<br>(0.576)            |
| R <sup>2</sup>            | 0.189                            | 0.561                             | 0.809                           |
| Adj. R <sup>2</sup>       | 0.172                            | 0.522                             | 0.767                           |
| Observations (state)      | 50                               | 50                                | 50                              |

*Note.* Unstandardized regression coefficients are displayed, with standard errors in parentheses.  
†  $p < 0.10$ . \*  $p < 0.05$ . \*\*  $p < 0.01$ . \*\*\*  $p < 0.001$ .

**Table S6**  
**Study 1a. Multilevel OLS Regressions Predicting Mask Usage**

|                           | <b>Model 1</b>              | <b>Model 2</b>              | <b>Model 3</b>             |
|---------------------------|-----------------------------|-----------------------------|----------------------------|
| <b>Fixed Effects</b>      |                             |                             |                            |
| Intercept                 | 2.336***<br>(0.221)         | 2.045***<br>(0.230)         | 3.399***<br>(0.478)        |
| <b>Collectivism</b>       | <b>0.015***<br/>(0.004)</b> | <b>0.015***<br/>(0.004)</b> | <b>0.007**<br/>(0.002)</b> |
| Median age                |                             | -0.002<br>(0.001)           | 0.003***<br>(0.001)        |
| % Male                    |                             | 0.077<br>(0.215)            | 0.423<br>(0.224)           |
| % College degree or above |                             | 0.012***<br>(0.001)         | 0.010***<br>(0.001)        |
| COVID-19 severity         |                             |                             | 0.0001***<br>(0.00003)     |
| Government stringency     |                             |                             | 0.007*<br>(0.003)          |
| Population density (log)  |                             |                             | 0.043***<br>(0.005)        |
| Income per capita (log)   |                             |                             | -0.068*<br>(0.031)         |
| % Republican              |                             |                             | -2.822***<br>(0.361)       |
| <b>Random Effects</b>     |                             |                             |                            |
| Intercept                 | 0.335<br>(0.035)            | 0.291<br>(0.030)            | 0.156<br>(0.017)           |
| Observations (county)     | 3141                        | 3141                        | 3070                       |
| Number of US states       | 50                          | 50                          | 50                         |
| AIC                       | 854                         | 354                         | 205                        |
| BIC                       | 878                         | 397                         | 277                        |
| Log likelihood            | -423                        | -170                        | -90                        |
| $\Omega_0^2$              | 0.59                        | 0.65                        | 0.66                       |

*Note.* Unstandardized regression coefficients are displayed, with standard errors in parentheses.

†  $p < 0.10$ . \*  $p < 0.05$ . \*\*  $p < 0.01$ . \*\*\*  $p < 0.001$ .

$\Omega_0^2$  represents generalized  $R^2$  for linear mixed effect models (1).

**Table S7**  
**Study 1b. Descriptive Statistics of the 50 US States**

| State          | State abbreviation | Collectivism | Mean mask usage |
|----------------|--------------------|--------------|-----------------|
| Alabama        | AL                 | 57           | 2.46            |
| Alaska         | AK                 | 48           | 2.43            |
| Arizona        | AZ                 | 49           | 2.45            |
| Arkansas       | AR                 | 54           | 2.27            |
| California     | CA                 | 60           | 3.10            |
| Colorado       | CO                 | 36           | 2.97            |
| Connecticut    | CT                 | 50           | 3.01            |
| Delaware       | DE                 | 55           | 3.10            |
| Florida        | FL                 | 54           | 2.89            |
| Georgia        | GA                 | 60           | 2.85            |
| Hawaii         | HI                 | 91           | 3.36            |
| Idaho          | ID                 | 42           | 2.02            |
| Illinois       | IL                 | 52           | 2.91            |
| Indiana        | IN                 | 57           | 2.64            |
| Iowa           | IA                 | 39           | 2.27            |
| Kansas         | KS                 | 38           | 1.96            |
| Kentucky       | KY                 | 53           | 2.58            |
| Louisiana      | LA                 | 72           | 2.87            |
| Maine          | ME                 | 45           | 2.79            |
| Maryland       | MD                 | 63           | 3.12            |
| Massachusetts  | MA                 | 46           | 2.99            |
| Michigan       | MI                 | 46           | 2.80            |
| Minnesota      | MN                 | 41           | 2.20            |
| Mississippi    | MS                 | 64           | 2.78            |
| Missouri       | MO                 | 46           | 2.45            |
| Montana        | MT                 | 31           | 1.93            |
| Nebraska       | NE                 | 35           | 2.64            |
| Nevada         | NV                 | 52           | 2.89            |
| New Hampshire  | NH                 | 43           | 2.32            |
| New Jersey     | NJ                 | 59           | 3.19            |
| New Mexico     | NM                 | 51           | 2.61            |
| New York       | NY                 | 53           | 3.25            |
| North Carolina | NC                 | 56           | 2.63            |
| North Dakota   | ND                 | 37           | 1.44            |
| Ohio           | OH                 | 45           | 2.48            |
| Oklahoma       | OK                 | 42           | 2.12            |
| Oregon         | OR                 | 33           | 2.66            |
| Pennsylvania   | PA                 | 52           | 2.93            |
| Rhode Island   | RI                 | 48           | 3.40            |
| South Carolina | SC                 | 70           | 2.66            |
| South Dakota   | SD                 | 36           | 1.94            |
| Tennessee      | TN                 | 56           | 2.46            |
| Texas          | TX                 | 58           | 2.75            |
| Utah           | UT                 | 61           | 2.70            |
| Vermont        | VT                 | 42           | 3.24            |
| Virginia       | VA                 | 60           | 2.74            |
| Washington     | WA                 | 37           | 2.68            |
| West Virginia  | WV                 | 48           | 2.65            |
| Wisconsin      | WI                 | 46           | 2.28            |
| Wyoming        | WY                 | 35           | 2.05            |

*Note.* The collectivism-individualism scores are sourced from Vandello and Cohen (1999).

Mask usage question: "How often have you worn a face mask outside your home (e.g., when on public transport, going to a supermarket, going to a main road)?" (0 = not at all, 1 = rarely, 2 = sometimes, 3 = frequently, 4 = always).

**Table S8**  
**Study 1b. US State-Level Descriptive Statistics and Correlations**

| Variables                    | <i>M</i> | <i>SD</i> | 1    | 2    | 3    | 4    | 5    | 6    | 7    | 8    | 9   | 10  |
|------------------------------|----------|-----------|------|------|------|------|------|------|------|------|-----|-----|
| 1. Mask usage                | 2.64     | 0.42      |      |      |      |      |      |      |      |      |     |     |
| 2. Collectivism              | 50.08    | 11.34     | .54  |      |      |      |      |      |      |      |     |     |
| 3. Tightness                 | 50.14    | 12.60     | -.33 | .23  |      |      |      |      |      |      |     |     |
| 4. % Republican              | 0.40     | 0.08      | -.76 | -.24 | .59  |      |      |      |      |      |     |     |
| 5. Government stringency     | 69.49    | 6.62      | .57  | .20  | -.38 | -.56 |      |      |      |      |     |     |
| 6. COVID-19 severity         | 94.98    | 42.13     | .16  | .36  | .37  | .01  | -.26 |      |      |      |     |     |
| 7. Median age                | 38.83    | 2.30      | .30  | -.03 | -.23 | -.43 | .48  | -.27 |      |      |     |     |
| 8. % Male                    | 0.49     | 0.01      | -.52 | -.43 | -.29 | .37  | -.32 | -.44 | -.48 |      |     |     |
| 9. % College degree or above | 0.30     | 0.05      | .40  | -.12 | -.60 | -.55 | .34  | -.10 | .15  | -.10 |     |     |
| 10. Population density       | 194.96   | 261.09    | .58  | .24  | -.26 | -.58 | .31  | .36  | .29  | -.50 | .54 |     |
| 11. Income per capita (US\$) | 54234.50 | 8632.47   | .32  | -.11 | -.63 | -.52 | .24  | -.01 | .07  | .09  | .82 | .57 |

**Table S9**  
**Study 1b. OLS Regressions Predicting Mask Usage at US State Level**

|                           | <b>Model 1</b>                    | <b>Model 2</b>                    | <b>Model 3</b>                  |
|---------------------------|-----------------------------------|-----------------------------------|---------------------------------|
| Intercept                 | 1.650***<br>(0.229)               | 3.878<br>(3.928)                  | 4.379<br>(5.628)                |
| <b>Collectivism</b>       | <b>0.020***</b><br><b>(0.004)</b> | <b>0.019***</b><br><b>(0.004)</b> | <b>0.010*</b><br><b>(0.004)</b> |
| Median age                |                                   | 0.030<br>(0.021)                  | -0.014<br>(0.023)               |
| % Male                    |                                   | -8.920<br>(6.675)                 | -0.189<br>(12.046)              |
| % College degree or above |                                   | 3.479***<br>(0.814)               | 0.801<br>(1.391)                |
| COVID-19 severity         |                                   |                                   | 0.0004<br>(0.001)               |
| Government stringency     |                                   |                                   | 0.014†<br>(0.007)               |
| Population density (log)  |                                   |                                   | 0.054<br>(0.061)                |
| Income per capita (log)   |                                   |                                   | -0.193<br>(0.499)               |
| % Republican              |                                   |                                   | -2.571***<br>(0.711)            |
| R <sup>2</sup>            | 0.291                             | 0.587                             | 0.759                           |
| Adj. R <sup>2</sup>       | 0.276                             | 0.550                             | 0.705                           |
| Observations (state)      | 50                                | 50                                | 50                              |

*Note.* Unstandardized regression coefficients are displayed, with standard errors in parentheses.  
†  $p < 0.10$ . \*  $p < 0.05$ . \*\*  $p < 0.01$ . \*\*\*  $p < 0.001$ .

**Table S10**  
**Study 1b. Multilevel OLS Regressions Predicting Mask Usage**

|                               | <b>Model 1</b>                    | <b>Model 2</b>                    | <b>Model 3</b>                    |
|-------------------------------|-----------------------------------|-----------------------------------|-----------------------------------|
| <b>Fixed Effects</b>          |                                   |                                   |                                   |
| Intercept                     | 0.313<br>(0.204)                  | -0.974***<br>(0.274)              | -0.964<br>(3.435)                 |
| <b>Collectivism</b>           | <b>0.017***</b><br><b>(0.004)</b> | <b>0.019***</b><br><b>(0.003)</b> | <b>0.011***</b><br><b>(0.003)</b> |
| Age                           |                                   | 0.004***<br>(0.001)               | 0.004***<br>(0.001)               |
| Gender (1 = male, 0 = female) |                                   | -0.251***<br>(0.022)              | -0.242***<br>(0.022)              |
| % College degree or above     |                                   | 3.792***<br>(0.655)               | 0.916<br>(0.989)                  |
| COVID-19 severity             |                                   |                                   | 0.001***<br>(0.0001)              |
| Government stringency         |                                   |                                   | 0.005*<br>(0.002)                 |
| Population density (log)      |                                   |                                   | 0.044<br>(0.029)                  |
| Income per capita (log)       |                                   |                                   | 0.128<br>(0.324)                  |
| % Republican                  |                                   |                                   | -2.126***<br>(0.535)              |
| Week fixed effects            | Yes                               | Yes                               | Yes                               |
| <b>Random Effects</b>         |                                   |                                   |                                   |
| Intercept                     | 0.277<br>(0.033)                  | 0.204<br>(0.027)                  | 0.137<br>(0.023)                  |
| Observations (person)         | 16737                             | 16737                             | 15952                             |
| Number of US states           | 50                                | 50                                | 50                                |
| AIC                           | 58742                             | 58556                             | 55982                             |
| BIC                           | 58919                             | 58757                             | 56213                             |
| Log likelihood                | -29348                            | -29252                            | -27961                            |
| $\Omega_0^2$                  | 0.23                              | 0.23                              | 0.24                              |

*Note.* Unstandardized regression coefficients are displayed, with standard errors in parentheses.

†  $p < 0.10$ . \*  $p < 0.05$ . \*\*  $p < 0.01$ . \*\*\*  $p < 0.001$ .

$\Omega_0^2$  represents generalized  $R^2$  for linear mixed effect models.

**Table S11**  
**Study 2. Descriptive Statistics of 29 Countries and Territories**

| <b>Country/ Territory</b> | <b>ISO code</b> | <b>Collectivism (Hofstede)</b> | <b>Collectivism (GLOBE)</b> | <b>Sample size</b> | <b>Mean age</b> | <b>% Male</b> | <b>Mask usage</b> |
|---------------------------|-----------------|--------------------------------|-----------------------------|--------------------|-----------------|---------------|-------------------|
| Australia                 | AUS             | 10                             | 4.17                        | 16045              | 47.02           | 49.7%         | 1.35              |
| Brazil                    | BRA             | 62                             | 5.18                        | 10274              | 40.74           | 49.4%         | 3.66              |
| Canada                    | CAN             | 20                             | 4.26                        | 11222              | 49.78           | 45.3%         | 2.56              |
| China                     | CHN             | 80                             | 5.80                        | 15704              | 32.70           | 56.1%         | 3.48              |
| Denmark                   | DNK             | 26                             | 3.53                        | 11651              | 47.81           | 48.9%         | 0.51              |
| Finland                   | FIN             | 37                             | 4.07                        | 11507              | 48.78           | 48.8%         | 0.52              |
| France                    | FRA             | 29                             | 4.37                        | 16900              | 48.95           | 45.8%         | 2.88              |
| Germany                   | DEU             | 33                             | 4.02                        | 15774              | 48.80           | 48.0%         | 2.78              |
| Hong Kong                 | HKG             | 75                             | 5.32                        | 6757               | 44.25           | 48.2%         | 3.72              |
| India                     | IND             | 52                             | 5.92                        | 16142              | 36.44           | 52.5%         | 3.67              |
| Indonesia                 | IDN             | 86                             | 5.68                        | 12053              | 30.38           | 54.7%         | 3.70              |
| Italy                     | ITA             | 24                             | 4.94                        | 15508              | 48.38           | 47.7%         | 3.70              |
| Japan                     | JPN             | 54                             | 4.63                        | 6382               | 48.66           | 52.8%         | 3.48              |
| Malaysia                  | MYS             | 74                             | 5.51                        | 11552              | 32.73           | 42.5%         | 3.71              |
| Mexico                    | MEX             | 70                             | 5.71                        | 11519              | 40.03           | 48.3%         | 3.62              |
| Netherlands               | NLD             | 20                             | 3.70                        | 6362               | 48.46           | 48.1%         | 0.97              |
| Norway                    | NOR             | 31                             | N/A                         | 11515              | 47.07           | 50.0%         | 0.53              |
| Philippines               | PHL             | 68                             | 6.36                        | 11426              | 36.11           | 47.6%         | 3.83              |
| Saudi Arabia              | SAU             | 75                             | N/A                         | 11161              | 34.60           | 63.8%         | 3.41              |
| Singapore                 | SGP             | 80                             | 5.64                        | 12965              | 44.20           | 49.5%         | 3.66              |
| Korea (South)             | KOR             | 82                             | 5.54                        | 5879               | 42.27           | 55.0%         | 3.68              |
| Spain                     | ESP             | 49                             | 5.45                        | 15540              | 46.70           | 48.8%         | 3.46              |
| Sweden                    | SWE             | 29                             | 3.66                        | 15126              | 49.16           | 49.1%         | 0.38              |
| Taiwan                    | TWN             | 83                             | 5.59                        | 11569              | 36.23           | 50.7%         | 3.34              |
| Thailand                  | THA             | 80                             | 5.70                        | 11880              | 35.07           | 48.0%         | 3.71              |
| United Arab Emirates      | ARE             | 75                             | N/A                         | 11603              | 34.91           | 67.3%         | 3.68              |
| United Kingdom            | GBR             | 11                             | 4.08                        | 25002              | 48.07           | 47.6%         | 1.75              |
| United States             | USA             | 9                              | 4.25                        | 16804              | 47.82           | 45.8%         | 2.79              |
| Vietnam                   | VNM             | 80                             | N/A                         | 11228              | 31.19           | 52.7%         | 3.61              |

*Note.* In line with the literature, we reverse-coded Hofstede's individualism index to denote collectivism (= 100 – individualism) for ease of interpretation.

Mask usage: "How often have you worn a face mask outside your home (e.g., when on public transport, going to a supermarket, going to a main road)?" (0 = not at all, 1 = rarely, 2 = sometimes, 3 = frequently, 4 = always).



**Table S12**  
**Study 2. Country-Level Descriptive Statistics and Correlations**

| Variables                     | <i>M</i> | <i>SD</i> | 1    | 2    | 3    | 4    | 5    | 6    | 7    | 8   | 9   |
|-------------------------------|----------|-----------|------|------|------|------|------|------|------|-----|-----|
| 1. Mask usage                 | 2.83     | 1.20      |      |      |      |      |      |      |      |     |     |
| 2. Collectivism (composite)   | -0.36    | 1.13      | .80  |      |      |      |      |      |      |     |     |
| 3. Tightness (= – Looseness)  | -60.14   | 27.13     | .53  | .75  |      |      |      |      |      |     |     |
| 4. Government stringency      | 62.53    | 13.84     | .34  | .13  | .13  |      |      |      |      |     |     |
| 5. COVID-19 severity          | 28.29    | 32.93     | .08  | -.14 | -.29 | .33  |      |      |      |     |     |
| 6. Median age                 | 38.67    | 6.26      | -.32 | -.48 | -.51 | -.53 | -.08 |      |      |     |     |
| 7. % Male                     | 50.69    | 4.12      | .15  | .27  | .48  | .06  | .12  | -.36 |      |     |     |
| 8. Population density         | 711.77   | 1964.08   | .22  | .26  | .07  | .00  | .09  | .22  | -.09 |     |     |
| 9. GDP per capita (US\$)      | 37055.47 | 19925.84  | -.38 | -.41 | -.36 | -.41 | .20  | .51  | .29  | .47 |     |
| 10. Universal health coverage | 78.93    | 8.89      | -.45 | -.58 | -.58 | -.43 | .14  | .75  | -.18 | .14 | .63 |

**Table S13**  
**Study 2. OLS Regressions Predicting Mask Usage at Country Level**

|                           | <b>Model 1</b>                    | <b>Model 2</b>                    | <b>Model 3</b>                    |
|---------------------------|-----------------------------------|-----------------------------------|-----------------------------------|
| Intercept                 | 3.144***<br>(0.143)               | 3.068<br>(2.438)                  | -1.264<br>(3.314)                 |
| <b>Collectivism</b>       | <b>0.855***</b><br><b>(0.123)</b> | <b>0.943***</b><br><b>(0.152)</b> | <b>0.945***</b><br><b>(0.193)</b> |
| Median age                |                                   | 0.020<br>(0.028)                  | 0.089 <sup>†</sup><br>(0.044)     |
| % Male                    |                                   | -0.013<br>(0.038)                 | 0.001<br>(0.049)                  |
| COVID-19 severity         |                                   |                                   | 0.005<br>(0.005)                  |
| Government stringency     |                                   |                                   | 0.039*<br>(0.016)                 |
| Population density (log)  |                                   |                                   | -0.004<br>(0.102)                 |
| GDP per capita (log)      |                                   |                                   | -0.001<br>(0.406)                 |
| Universal health coverage |                                   |                                   | -0.020<br>(0.029)                 |
| R <sup>2</sup>            | 0.643                             | 0.659                             | 0.786                             |
| Adj. R <sup>2</sup>       | 0.630                             | 0.616                             | 0.692                             |
| Observations (country)    | 29                                | 28                                | 27                                |

*Note.* Unstandardized regression coefficients are displayed, with standard errors in parentheses.

<sup>†</sup>  $p < 0.10$ . \*  $p < 0.05$ . \*\*  $p < 0.01$ . \*\*\*  $p < 0.001$ .

**Table S14**  
**Study 2. Multilevel OLS Regressions Predicting Mask Usage**

|                               | <b>Model 1</b>                    | <b>Model 2</b>                    | <b>Model 3</b>                    |
|-------------------------------|-----------------------------------|-----------------------------------|-----------------------------------|
| <b>Fixed Effects</b>          |                                   |                                   |                                   |
| Intercept                     | 2.147***<br>(0.144)               | 2.203***<br>(0.144)               | 2.780<br>(2.488)                  |
| <b>Collectivism</b>           | <b>0.834***</b><br><b>(0.124)</b> | <b>0.836***</b><br><b>(0.124)</b> | <b>0.794***</b><br><b>(0.175)</b> |
| Age                           |                                   | -0.00002<br>(0.0001)              | -0.0001<br>(0.0001)               |
| Gender (1 = male, 0 = female) |                                   | -0.108***<br>(0.004)              | -0.104***<br>(0.004)              |
| COVID-19 severity             |                                   |                                   | 0.00004<br>(0.00007)              |
| Government stringency         |                                   |                                   | -0.002***<br>(0.0002)             |
| Population density (log)      |                                   |                                   | 0.085<br>(0.097)                  |
| GDP per capita (log)          |                                   |                                   | -0.166<br>(0.307)                 |
| Universal health coverage     |                                   |                                   | 0.011<br>(0.025)                  |
| Week fixed effects            | Yes                               | Yes                               | Yes                               |
| <b>Random Effects</b>         |                                   |                                   |                                   |
| Intercept                     | 0.738<br>(0.097)                  | 0.737<br>(0.097)                  | 0.749<br>(0.102)                  |
| Observations (person)         | 367050                            | 367050                            | 348724                            |
| Number of countries           | 29                                | 29                                | 27                                |
| AIC                           | 1118398                           | 1117532                           | 1068292                           |
| BIC                           | 1118701                           | 1117857                           | 1068669                           |
| Log likelihood                | -559171                           | -558736                           | -534111                           |
| $\Omega_0^2$                  | 0.54                              | 0.54                              | 0.55                              |

*Note.* Unstandardized regression coefficients are displayed, with standard errors in parentheses.

†  $p < 0.10$ . \*  $p < 0.05$ . \*\*  $p < 0.01$ . \*\*\*  $p < 0.001$ .

$\Omega_0^2$  represents generalized  $R^2$  for linear mixed effect models.

**Table S15**  
**Study 3. Descriptive Statistics of 67 Countries and Territories**

| Country/<br>Territory | ISO<br>code | Collectivism<br>(Hofstede) | Collectivism<br>(GLOBE) | Sample<br>size | Mean age<br>(categorical) | %<br>Male | % of<br>respondents<br>who used<br>mask | Perceived<br>community<br>mask usage |
|-----------------------|-------------|----------------------------|-------------------------|----------------|---------------------------|-----------|-----------------------------------------|--------------------------------------|
| Afghanistan           | AFG         | N/A                        | N/A                     | 876            | 2.66                      | 93.6%     | 56.2%                                   | 35.92                                |
| Algeria               | DZA         | 65                         | N/A                     | 1072           | 3.42                      | 73.3%     | 83.8%                                   | 52.22                                |
| Angola                | AGO         | 82                         | N/A                     | 1152           | 3.19                      | 71.7%     | 94.6%                                   | 74.96                                |
| Argentina             | ARG         | 54                         | 5.51                    | 10673          | 3.69                      | 36.5%     | 93.6%                                   | 80.34                                |
| Australia             | AUS         | 10                         | 4.17                    | 1171           | 4.24                      | 39.7%     | 48.3%                                   | 34.81                                |
| Azerbaijan            | AZE         | 78                         | N/A                     | 795            | 3.40                      | 62.5%     | 79.9%                                   | 59.11                                |
| Bangladesh            | BGD         | 80                         | N/A                     | 9096           | 2.60                      | 81.1%     | 84.6%                                   | 57.86                                |
| Bolivia               | BOL         | 90                         | 5.47                    | 1014           | 2.93                      | 52.4%     | 92.5%                                   | 70.50                                |
| Brazil                | BRA         | 62                         | 5.18                    | 9986           | 3.53                      | 40.1%     | 91.2%                                   | 70.05                                |
| Cambodia              | KHM         | N/A                        | N/A                     | 804            | 2.76                      | 76.6%     | 82.1%                                   | 54.93                                |
| Cameroon              | CMR         | N/A                        | N/A                     | 1216           | 2.95                      | 70.3%     | 86.4%                                   | 44.96                                |
| Canada                | CAN         | 20                         | 4.26                    | 1153           | 4.21                      | 38.8%     | 87.7%                                   | 60.37                                |
| Chile                 | CHL         | 77                         | N/A                     | 1020           | 3.67                      | 40.8%     | 93.4%                                   | 83.49                                |
| Colombia              | COL         | 87                         | 5.73                    | 10428          | 3.18                      | 45.5%     | 91.6%                                   | 77.85                                |
| Cote d'Ivoire         | CIV         | N/A                        | N/A                     | 920            | 3.24                      | 81.4%     | 89.2%                                   | 52.86                                |
| Ecuador               | ECU         | 92                         | 5.81                    | 1028           | 3.01                      | 51.0%     | 93.6%                                   | 75.55                                |
| Egypt                 | EGY         | 75                         | 5.64                    | 8803           | 3.06                      | 70.1%     | 76.3%                                   | 47.55                                |
| Estonia               | EST         | 40                         | N/A                     | 809            | 3.35                      | 39.9%     | 18.4%                                   | 14.46                                |
| France                | FRA         | 29                         | 4.37                    | 11075          | 3.96                      | 39.0%     | 91.9%                                   | 67.88                                |
| Georgia               | GEO         | 59                         | 6.19                    | 828            | 3.46                      | 51.4%     | 81.5%                                   | 70.78                                |
| Germany               | DEU         | 33                         | 4.02                    | 10562          | 3.93                      | 45.4%     | 92.6%                                   | 73.46                                |
| Ghana                 | GHA         | 85                         | N/A                     | 1095           | 2.84                      | 71.3%     | 95.3%                                   | 62.23                                |
| Guatemala             | GTM         | 94                         | 5.63                    | 1069           | 2.88                      | 51.7%     | 95.1%                                   | 79.69                                |
| Honduras              | HND         | 80                         | N/A                     | 971            | 3.06                      | 47.8%     | 92.8%                                   | 69.36                                |
| India                 | IND         | 52                         | 5.92                    | 10647          | 2.87                      | 80.8%     | 89.3%                                   | 74.78                                |
| Indonesia             | IDN         | 86                         | 5.68                    | 10798          | 3.18                      | 65.5%     | 87.7%                                   | 75.04                                |
| Iraq                  | IRQ         | 70                         | N/A                     | 1015           | 3.22                      | 81.0%     | 79.0%                                   | 41.26                                |
| Italy                 | ITA         | 24                         | 4.94                    | 11485          | 4.04                      | 43.7%     | 94.5%                                   | 64.75                                |
| Jamaica               | JAM         | 61                         | N/A                     | 814            | 3.69                      | 32.6%     | 92.4%                                   | 67.24                                |
| Japan                 | JPN         | 54                         | 4.63                    | 10452          | 4.71                      | 63.7%     | 95.2%                                   | 85.27                                |
| Kazakhstan            | KAZ         | 80                         | 5.26                    | 1022           | 3.92                      | 41.3%     | 85.2%                                   | 63.93                                |
| Kenya                 | KEN         | 75                         | N/A                     | 1377           | 3.10                      | 69.5%     | 91.9%                                   | 61.45                                |
| Korea (South)         | KOR         | 82                         | 5.54                    | 1106           | 3.80                      | 66.9%     | 95.0%                                   | 85.10                                |
| Malaysia              | MYS         | 74                         | 5.51                    | 9478           | 3.38                      | 56.1%     | 93.7%                                   | 82.04                                |
| Mexico                | MEX         | 70                         | 5.71                    | 9296           | 3.11                      | 46.1%     | 92.4%                                   | 60.81                                |
| Mongolia              | MNG         | N/A                        | N/A                     | 685            | 2.85                      | 46.6%     | 81.0%                                   | 62.48                                |
| Morocco               | MAR         | 54                         | 5.87                    | 1107           | 3.28                      | 72.2%     | 87.1%                                   | 53.20                                |
| Mozambique            | MOZ         | 85                         | N/A                     | 1279           | 2.90                      | 68.0%     | 87.4%                                   | 69.42                                |
| Myanmar               | MMR         | N/A                        | N/A                     | 950            | 2.91                      | 73.2%     | 85.9%                                   | 58.33                                |
| Nepal                 | NPL         | 70                         | N/A                     | 1122           | 2.64                      | 76.2%     | 88.7%                                   | 72.18                                |
| Netherlands           | NLD         | 20                         | 3.70                    | 1138           | 4.62                      | 39.6%     | 38.8%                                   | 26.11                                |
| Nigeria               | NGA         | 70                         | 5.55                    | 9177           | 3.22                      | 76.6%     | 83.1%                                   | 52.80                                |
| Pakistan              | PAK         | 86                         | N/A                     | 8660           | 2.72                      | 80.3%     | 79.2%                                   | 51.63                                |
| Peru                  | PER         | 84                         | N/A                     | 1066           | 3.23                      | 48.6%     | 92.5%                                   | 81.64                                |
| Philippines           | PHL         | 68                         | 6.36                    | 9630           | 3.01                      | 43.7%     | 96.0%                                   | 86.46                                |
| Poland                | POL         | 40                         | 5.52                    | 10220          | 3.66                      | 40.5%     | 83.4%                                   | 57.33                                |
| Portugal              | PRT         | 73                         | 5.51                    | 995            | 3.91                      | 40.4%     | 95.9%                                   | 73.46                                |
| Romania               | ROU         | 70                         | N/A                     | 9866           | 3.75                      | 47.7%     | 88.7%                                   | 61.31                                |
| Senegal               | SEN         | 75                         | N/A                     | 813            | 3.44                      | 71.2%     | 88.7%                                   | 49.35                                |
| Singapore             | SGP         | 80                         | 5.64                    | 1008           | 3.70                      | 56.7%     | 97.0%                                   | 92.52                                |
| South Africa          | ZAF         | 35                         | 4.79                    | 1271           | 3.70                      | 41.0%     | 96.5%                                   | 72.82                                |
| Spain                 | ESP         | 49                         | 5.45                    | 1123           | 3.77                      | 39.7%     | 96.9%                                   | 75.52                                |
| Sri Lanka             | LKA         | 65                         | N/A                     | 917            | 3.23                      | 70.4%     | 92.8%                                   | 83.66                                |

|                      |     |     |      |       |      |       |       |       |
|----------------------|-----|-----|------|-------|------|-------|-------|-------|
| Sudan                | SDN | N/A | N/A  | 1115  | 2.83 | 76.0% | 53.1% | 28.18 |
| Taiwan               | TWN | 83  | 5.59 | 331   | 3.68 | 55.8% | 90.6% | 77.43 |
| Tanzania             | TZA | 75  | N/A  | 897   | 3.04 | 82.1% | 62.3% | 32.00 |
| Thailand             | THA | 80  | 5.70 | 10404 | 3.81 | 54.3% | 93.7% | 82.44 |
| Trinidad and Tobago  | TTO | 84  | N/A  | 1054  | 3.68 | 35.5% | 93.8% | 57.74 |
| Turkey               | TUR | 63  | 5.88 | 10335 | 3.59 | 71.7% | 84.8% | 64.79 |
| United Arab Emirates | ARE | 75  | N/A  | 940   | 3.25 | 66.7% | 94.8% | 89.91 |
| Uganda               | UGA | N/A | N/A  | 1459  | 2.85 | 76.5% | 86.9% | 46.35 |
| United Kingdom       | GBR | 11  | 4.08 | 10335 | 4.16 | 38.3% | 86.0% | 56.35 |
| Ukraine              | UKR | 75  | N/A  | 1051  | 3.49 | 36.5% | 78.3% | 53.61 |
| Uruguay              | URY | 64  | N/A  | 968   | 4.02 | 30.1% | 94.5% | 71.83 |
| United States        | USA | 9   | 4.25 | 8875  | 4.42 | 36.3% | 91.4% | 65.99 |
| Venezuela            | VEN | 88  | 5.53 | 1395  | 3.84 | 48.8% | 96.2% | 76.78 |
| Vietnam              | VNM | 80  | N/A  | 11534 | 2.68 | 56.6% | 89.2% | 83.39 |

*Note.* In line with the literature, we reverse-coded Hofstede's individualism index to denote collectivism (= 100 – individualism) for ease of interpretation.

Age categories: 1 = under 20, 2 = 20 to 30, 3 = 31 to 40, ... 7 = 71 to 80, 8 = over 80.

Perceived community mask usage: Out of 100 people in your community, how many do you think wear a face mask or covering when they go out in public?

**Table S16**  
**Study 3. Country-Level Descriptive Statistics and Correlations**

| Variables                         | <i>M</i> | <i>SD</i> | 1    | 2    | 3    | 4    | 5    | 6    | 7    | 8    | 9   | 10  |
|-----------------------------------|----------|-----------|------|------|------|------|------|------|------|------|-----|-----|
| 1. Personal mask usage            | 0.86     | 0.14      |      |      |      |      |      |      |      |      |     |     |
| 2. Perceived community mask usage | 63.45    | 17.41     | .73  |      |      |      |      |      |      |      |     |     |
| 3. Collectivism (composite)       | 0.22     | 0.87      | .39  | .37  |      |      |      |      |      |      |     |     |
| 4. Tightness (= – Looseness)      | -51.42   | 28.28     | -.08 | -.09 | .59  |      |      |      |      |      |     |     |
| 5. Government stringency          | 62.77    | 19.05     | .23  | .15  | .22  | -.04 |      |      |      |      |     |     |
| 6. COVID-19 severity              | 33.73    | 49.58     | .25  | .29  | -.05 | -.34 | .46  |      |      |      |     |     |
| 7. Median age                     | 31.28    | 8.96      | .03  | .26  | -.53 | -.55 | -.38 | .05  |      |      |     |     |
| 8. % Male                         | 49.73    | 2.71      | .08  | .17  | .12  | .43  | -.02 | -.01 | -.12 |      |     |     |
| 9. Population density             | 278.53   | 1020.96   | .10  | .23  | .09  | .03  | -.09 | .00  | .18  | .13  |     |     |
| 10. GDP per capita (US\$)         | 18528.55 | 17258.41  | .00  | .20  | -.55 | -.48 | -.29 | .10  | .72  | .34  | .48 |     |
| 11. Universal health coverage     | 67.14    | 14.46     | .12  | .31  | -.53 | -.56 | -.15 | .28  | .85  | -.01 | .15 | .74 |

**Table S17**  
**Study 3. OLS Regressions Predicting Personal Mask Usage at Country Level**

|                           | <b>Model 1</b>                   | <b>Model 2</b>                   | <b>Model 3</b>                   |
|---------------------------|----------------------------------|----------------------------------|----------------------------------|
| Intercept                 | 0.855***<br>(0.017)              | 0.569†<br>(0.319)                | 0.369<br>(0.338)                 |
| <b>Collectivism</b>       | <b>0.062**</b><br><b>(0.020)</b> | <b>0.077**</b><br><b>(0.024)</b> | <b>0.069**</b><br><b>(0.025)</b> |
| Median age                |                                  | 0.003<br>(0.002)                 | 0.003<br>(0.005)                 |
| % Male                    |                                  | 0.004<br>(0.006)                 | 0.004<br>(0.007)                 |
| COVID-19 severity         |                                  |                                  | 0.0005<br>(0.0004)               |
| Government stringency     |                                  |                                  | 0.002<br>(0.001)                 |
| Population density (log)  |                                  |                                  | 0.020<br>(0.015)                 |
| GDP per capita (log)      |                                  |                                  | -0.014<br>(0.043)                |
| Universal health coverage |                                  |                                  | 0.002<br>(0.003)                 |
| R <sup>2</sup>            | 0.151                            | 0.178                            | 0.306                            |
| Adj. R <sup>2</sup>       | 0.136                            | 0.132                            | 0.193                            |
| Observations (country)    | 59                               | 58                               | 58                               |

*Note.* Unstandardized regression coefficients are displayed, with standard errors in parentheses.

†  $p < 0.10$ . \*  $p < 0.05$ . \*\*  $p < 0.01$ . \*\*\*  $p < 0.001$ .

**Table S18**  
**Study 3. OLS Regressions Predicting Perceived Community Mask Usage at Country Level**

|                           | <b>Model 1</b>                   | <b>Model 2</b>                     | <b>Model 3</b>                    |
|---------------------------|----------------------------------|------------------------------------|-----------------------------------|
| Intercept                 | 64.882***<br>(1.998)             | -14.363<br>(33.541)                | -34.877<br>(34.734)               |
| <b>Collectivism</b>       | <b>6.774**</b><br><b>(2.254)</b> | <b>10.713***</b><br><b>(2.510)</b> | <b>9.682***</b><br><b>(2.573)</b> |
| Median age                |                                  | 0.818**<br>(0.254)                 | 0.815<br>(0.500)                  |
| % Male                    |                                  | 1.042<br>(0.640)                   | 1.130<br>(0.753)                  |
| COVID-19 severity         |                                  |                                    | 0.068<br>(0.042)                  |
| Government stringency     |                                  |                                    | 0.177<br>(0.119)                  |
| Population density (log)  |                                  |                                    | 2.156<br>(1.528)                  |
| GDP per capita (log)      |                                  |                                    | -2.341<br>(4.462)                 |
| Universal health coverage |                                  |                                    | 0.218<br>(0.318)                  |
| R <sup>2</sup>            | 0.137                            | 0.295                              | 0.431                             |
| Adj. R <sup>2</sup>       | 0.122                            | 0.255                              | 0.338                             |
| Observations (country)    | 59                               | 58                                 | 58                                |

*Note.* Unstandardized regression coefficients are displayed, with standard errors in parentheses.  
<sup>†</sup>  $p < 0.10$ . \*  $p < 0.05$ . \*\*  $p < 0.01$ . \*\*\*  $p < 0.001$ .



**Table S19**  
**Study 3. Multilevel Logistic Regressions Predicting Personal Mask Usage**

|                               | <b>Model 1</b>                   | <b>Model 2</b>                   | <b>Model 3</b>                   |
|-------------------------------|----------------------------------|----------------------------------|----------------------------------|
| <b>Fixed Effects</b>          |                                  |                                  |                                  |
| Intercept                     | 1.956***<br>(0.119)              | 0.614***<br>(0.128)              | -3.844**<br>(1.490)              |
| <b>Collectivism</b>           | <b>0.348**</b><br><b>(0.131)</b> | <b>0.400**</b><br><b>(0.135)</b> | <b>0.491**</b><br><b>(0.152)</b> |
| Age (categorical)             |                                  | 0.045***<br>(0.005)              | 0.045***<br>(0.005)              |
| Gender (1 = male, 0 = female) |                                  | -0.545***<br>(0.014)             | -0.545***<br>(0.014)             |
| Education                     |                                  | 0.401***<br>(0.009)              | 0.401***<br>(0.009)              |
| COVID-19 severity             |                                  |                                  | 0.0004<br>(0.0004)               |
| Government stringency         |                                  |                                  | 0.018***<br>(0.001)              |
| Population density (log)      |                                  |                                  | 0.172*<br>(0.084)                |
| GDP per capita (log)          |                                  |                                  | 0.128<br>(0.236)                 |
| Universal health coverage     |                                  |                                  | 0.018<br>(0.016)                 |
| Week fixed effects            | Yes                              | Yes                              | Yes                              |
| <b>Random Effects</b>         |                                  |                                  |                                  |
| Intercept                     | 0.864<br>(0.080)                 | 0.887<br>(0.083)                 | 0.807<br>(0.076)                 |
| Observations (person)         | 268801                           | 264661                           | 264332                           |
| Number of countries           | 59                               | 59                               | 58                               |
| AIC                           | 176056                           | 167806                           | 167383                           |
| BIC                           | 176203                           | 167985                           | 167614                           |
| Log likelihood                | -88014                           | -83886                           | -83670                           |

*Note.* Unstandardized regression coefficients are displayed, with standard errors in parentheses.

†  $p < 0.10$ . \*  $p < 0.05$ . \*\*  $p < 0.01$ . \*\*\*  $p < 0.001$ .

Age categories: 1 = under 20, 2 = 20 to 30, 3 = 31 to 40, ... 7 = 71 to 80, 8 = over 80.

Education categories: 1 = less than primary school, 2 = primary school, 3 = secondary school, 4 = college/university, 5 = graduate school.

**Table S20**  
**Study 3. Multilevel OLS Regressions Predicting Perceived Community Mask Usage**

|                               | <b>Model 1</b>                   | <b>Model 2</b>                   | <b>Model 3</b>                     |
|-------------------------------|----------------------------------|----------------------------------|------------------------------------|
| <b>Fixed Effects</b>          |                                  |                                  |                                    |
| Intercept                     | 61.650***<br>(1.989)             | 60.045***<br>(2.058)             | -9.682<br>(22.831)                 |
| <b>Collectivism</b>           | <b>6.745**</b><br><b>(2.211)</b> | <b>6.639**</b><br><b>(2.218)</b> | <b>10.123***</b><br><b>(2.336)</b> |
| Age (categorical)             |                                  | -0.373***<br>(0.062)             | -0.372***<br>(0.062)               |
| Gender (1 = male, 0 = female) |                                  | -1.115***<br>(0.180)             | -1.094***<br>(0.180)               |
| Education                     |                                  | 0.954***<br>(0.115)              | 0.956***<br>(0.115)                |
| COVID-19 severity             |                                  |                                  | 0.016***<br>(0.004)                |
| Government stringency         |                                  |                                  | 0.124***<br>(0.017)                |
| Population density (log)      |                                  |                                  | 2.563*<br>(1.288)                  |
| GDP per capita (log)          |                                  |                                  | 1.757<br>(3.624)                   |
| Universal health coverage     |                                  |                                  | 0.462 <sup>†</sup><br>(0.248)      |
| Week fixed effects            | Yes                              | Yes                              | Yes                                |
| <b>Random Effects</b>         |                                  |                                  |                                    |
| Intercept                     | 14.540<br>(1.350)                | 14.591<br>(1.355)                | 12.426<br>(1.168)                  |
| Observations (person)         | 101336                           | 99924                            | 99830                              |
| Number of countries           | 59                               | 59                               | 58                                 |
| AIC                           | 955204                           | 941359                           | 940371                             |
| BIC                           | 955346                           | 941530                           | 940590                             |
| Log likelihood                | -477587                          | -470661                          | -470162                            |
| $\Omega_0^2$                  | 0.17                             | 0.17                             | 0.18                               |

*Note.* Unstandardized regression coefficients are displayed, with standard errors in parentheses.

<sup>†</sup>  $p < 0.10$ . \*  $p < 0.05$ . \*\*  $p < 0.01$ . \*\*\*  $p < 0.001$ .

$\Omega_0^2$  represents generalized  $R^2$  for linear mixed effect models.

Age categories: 1 = under 20, 2 = 20 to 30, 3 = 31 to 40, ... 7 = 71 to 80, 8 = over 80.

Education categories: 1 = less than primary school, 2 = primary school, 3 = secondary school, 4 = college/university, 5 = graduate school.

**Table S21**  
**Study 3. Mask Usage Questions in 51 Languages**

| Language | Personal Mask Usage                                                                                        | Perceived Community Mask Usage                         |
|----------|------------------------------------------------------------------------------------------------------------|--------------------------------------------------------|
| EN       | What measures have you taken to prevent infection from COVID-19 in the past week?                          | Wearing a face mask or covering                        |
| PT-BR    | Que medidas você tomou para evitar a infecção da COVID-19 na semana passada?                               | Usar uma máscara ou proteção facial                    |
| CEB      | له ماوهى يهك ههفتهى رابردو دا چ كارگهليت كردوه بو نهوهى ريگه بگريت له توشبون به كوڤيدى 19؟                 | بهكار هينانى ماسكى دموچاو يان دممامك                   |
| AR       | ما الإجراءات التي اتخذتها لمنع الإصابة بعدوى فيروس كورونا (كوفيد-19) خلال الأسبوع الماضي؟                  | ارتداء كمامة أو غطاء وجه                               |
| AZ-AZ    | Ötən həftə COVID-19 infeksiyasından qorunmaq üçün hansı tədbirlər görmüsüz?                                | Üzmaskası yaxud örtük taxıram                          |
| BN       | গত সপ্তাহে কোভিড-19 সংক্রমণ আটকাতে আপনি কী ব্যবস্থা নিয়েছেন?                                              | ফেস মাস্ক পরা বা মুখ ঢেকে রাখা                         |
| CA       | Quines mesures has pres per evitar infectar-te amb la COVID-19 durant l'última setmana?                    | Portar una mascareta o cobrir-me la cara               |
| DE       | Welche Maßnahmen hast du in der vergangenen Woche getroffen, um eine Ansteckung mit COVID-19 zu vermeiden? | Eine Gesichtsmaske oder einen Mund-Nasen-Schutz tragen |
| EN-GB    | What measures have you taken to prevent infection from COVID-19 in the past week?                          | Wearing a face mask or covering                        |

|       |                                                                                                                  |                                                        |                                                                                                                                                 |                                                        |
|-------|------------------------------------------------------------------------------------------------------------------|--------------------------------------------------------|-------------------------------------------------------------------------------------------------------------------------------------------------|--------------------------------------------------------|
| ET    | Milliseid meetmeid olete viimase nädala jooksul võtnud COVID-19 nakkuse vältimiseks?                             | Maski või näokatte kandmine                            | think do the following when they go out in public?<br>Kui paljud teie kogukonna 100 inimesest teevad teie arvates avalikus kohas järgmisi asju? | Kannavad maski või katavad näo                         |
| FA    | COVID-19 برای پیشگیری از ابتلا به در هفته گذشته، چه اقداماتی انجام دادید؟                                        | استفاده از ماسک یا پوشش صورت                           | از هر 100 نفر در اجتماع شما، فکر می‌کنید چند نفر در زمان حضور در اماکن عمومی کارهای زیر را انجام می‌دهند؟                                       | از ماسک یا پوشش صورت استفاده می‌کنند                   |
| FR    | Quelles mesures avez-vous prises pour éviter une contamination par le COVID-19 au cours de la semaine dernière ? | Porter un masque de protection ou se couvrir le visage | D'après vous, sur 100 personnes dans votre communauté, combien respectent les règles suivantes lorsqu'ils sortent en public ?                   | Porter un masque de protection ou se couvrir le visage |
| FR-CA | Au cours de la dernière semaine, quelles mesures avez-vous prises pour éviter d'attraper la COVID-19?            | Porter un masque ou un couvre-visage                   | Selon vous, combien de personnes sur 100 dans votre communauté respectent les mesures suivantes lorsqu'elles sortent en public?                 | Porter un masque ou un couvre-visage                   |
| GU    | ગત અઠવાડિયામાં COVID-19ના સંક્રમણને અટકાવવા માટે તમે કયા પગલાં લીધા છે?                                          | ફેસ માસ્ક પહેરવો કે ચહેરાને કપડાંથી ઢાંકવું            | તમને શું લાગે છે કે તમારી કોમ્યુનિટીના 100 માંથી કેટલા લોકો સાંવજનિક સ્થળોએ જતી વખતે નીચેની બાબતોને અનુસરે છે?                                  | ફેસ માસ્ક પહેરે છે કે ચહેરાને કપડાંથી ઢાંકે છે         |
| HI    | COVID-19 के संक्रमण से बचने के लिए आपने पिछले हफ्ते क्या उपाय किए हैं?                                           | फ़ेस मास्क या चेहरे को ढँकने वाली कोई चीज़ पहनना       | आपकी कम्युनिटी के 100 लोगों में से, आपके अनुसार कितने लोग भीड़ में बाहर जाने के समय ये काम करते हैं?                                            | फ़ेस मास्क या चेहरे को ढँकने वाली कोई चीज़ पहनना       |
| HR    | Koje ste mjere poduzeli u posljednjih tjedan dana da biste spriječili infekciju koronavirusom COVID-19?          | Nošenje maske za lice ili prekrivala                   | Od 100 ljudi u vašoj zajednici, koliko mislite da ih se pridržava sljedećih pravila kada izlaze u javnost?                                      | Nose masku za lice ili prekrivalo                      |
| HU    | Milyen óvintézkedéseket tettél az elmúlt héten a koronavírus-fertőzés (COVID-19) megelőzéséért?                  | Arcmaszk viselése vagy az arc eltakarása.              | A közösségben 100 ember közül szerinted hányan tartják be az alábbiakat, ha nyilvános helyre mennek?                                            | Arcmaszk viselése vagy az arc eltakarása.              |
| HYE   | Անցած շաբաթվա ընթացքում COVID-19-ի վարակը կանխելու համար ի՞նչ միջոցներ եք ձեռնարկել:                             | Դեմքի դիմակ կամ ծածկող այլ միջոց կրելը                 | Ձեր կարծիքով ձեր համայնքի 100 մարդուց քանի՞սն են անում հետևյալը, երբ գնում դուրս են գալիս մարդկանց մեջ:                                         | Դիմակ կամ ծածկող միջոց են կրում դեմքին                 |

|     |                                                                                                                |                                                   |                                                                                                                               |                                                |
|-----|----------------------------------------------------------------------------------------------------------------|---------------------------------------------------|-------------------------------------------------------------------------------------------------------------------------------|------------------------------------------------|
| ID  | Langkah-langkah apa yang sudah Anda ambil untuk mencegah infeksi COVID-19 dalam seminggu terakhir?             | Memakai masker                                    | Dari 100 orang di komunitas Anda, berapa banyak menurut Anda yang melakukan hal berikut ketika keluar ke tempat publik?       | Memakai masker                                 |
| IT  | Quali misure hai preso per prevenire l'infezione da COVID-19 nella scorsa settimana?                           | Ho indossato una mascherina o un'altra protezione | Su 100 persone nella tua comunità, quante ritieni adottino i seguenti comportamenti quando sono in pubblico?                  | Indossare una mascherina o un'altra protezione |
| JA  | 先週、新型コロナウイルス感染症の感染を防ぐために執った対策を教えてください。                                                                         | マスクやフェイスマスクを着用する                                  | お住まいの地域で、公共の場で次の行動を執る人は100人中何人くらいだと思いますか？                                                                                     | マスクやフェイスマスクを着用する                               |
| KAN | ಳದ ವಾರದಲ್ಲಿ COVID-19 ನಿಂದ ಸೋಂಕನ್ನು ತಡೆಗಟ್ಟಲು ನೀವು ಯಾವ ಕ್ರಮಗಳನ್ನು ತೆಗೆದುಕೊಂಡಿದ್ದೀರಿ?                            | ಮುಖದ ಮಾಸ್ಕ್ ಅಥವಾ ಆವರಿಸುವಿಕೆಯನ್ನು ಧರಿಸುವುದು        | ನಿಮ್ಮ ಸಮುದಾಯದ 100 ಜನರಲ್ಲಿ, ಅವರು ಸಾರ್ವಜನಿಕವಾಗಿ ಹೊರಗೆ ಹೋದಾಗ ಎಷ್ಟು ಮಂದಿ ಈ ಕೆಳಗಿನವುಗಳನ್ನು ಮಾಡುತ್ತಾರೆ ಎಂದು ನೀವು ಭಾವಿಸುತ್ತೀರಿ?      | ಮುಖದ ಮಾಸ್ಕ್ ಅಥವಾ ಆವರಿಸುವಿಕೆಯನ್ನು ಧರಿಸಿ         |
| KAT | რამდენიმე თვის განმავლობაში COVID-19-ით ინფიცირებულების პრევენციის საბუნებისმიერ ღონისძიებებს გასული კვირისას? | ვატარებ ნიღაბს ან დამცავ საშუალებებს              | თქვენს თემში 100 ადამიანს რამდენი იტყვიან რომ ისინი საზოგადოებაში გასვლისას?                                                  | ატარებ ნიღაბს ან დამცავ საშუალებებს            |
| KAZ | Соңғы аптада COVID-19 жұқтырмау үшін қандай шаралар қолдандыңыз?                                               | Бетперде немесе қорғаныс қалқанын кию             | Сіздің ойыңызша, көпшілік жиналатын орындарға шыққанда, қауымыңыздағы 100 адамның ішінен қанша адам төмендегілерді орындайды? | Бетперде немесе қорғаныс қалқанын кию          |
| KM  | តើអ្នកបានចាត់វិធានការណ៍ខ្លះដើម្បីការពារការឆ្លងពីជំងឺ COVID-19 កាលពីសប្តាហ៍មុន?                                 | ពាក់ម៉ាស់មុខ ឬម៉ាស់ក្រណាត់                        | ក្នុងចំណោមមនុស្ស 100 នាក់នៅក្នុងសហគមន៍របស់អ្នក តើអ្នកគិតថាមានមនុស្សប៉ុន្មាននាក់ដែលអនុវត្តតាមដូចខាងក្រោមនៅពេល                  | ពាក់ម៉ាស់មុខ ឬម៉ាស់ក្រណាត់                     |

|     |                                                                                                                 |                                                              | <p>සියලුම ක්ෂේත්‍රවලදී ප්‍රතිරෝධී සාධක<br/>                 කොටස්?</p>                                                                                        |                                                      |
|-----|-----------------------------------------------------------------------------------------------------------------|--------------------------------------------------------------|---------------------------------------------------------------------------------------------------------------------------------------------------------------|------------------------------------------------------|
| KO  | <p>지난 한 주간 코로나 19 감염 예방을 위해 어떤 조치를 취했나요?</p>                                                                    | <p>마스크 착용 또는 코와 입 가리기</p>                                    | <p>귀하의 지역 사회에서 100 명 중 몇 명 정도가 공공장소에서 다음 수칙을 지킨다고 생각하시나요?</p>                                                                                                 | <p>마스크 착용 또는 코와 입 가림</p>                             |
| MAL | <p>കഴിഞ്ഞ ആഴ്ച COVID-19 അണുബാധയിൽ നിന്ന് രക്ഷ നേടാൻ നിങ്ങൾ എന്ത് നടപടികളാണ് സ്വീകരിച്ചത്?</p>                   | <p>മാസ്ക് അല്ലെങ്കിൽ മുഖാവരണം ധരിക്കുന്നു</p>                | <p>നിങ്ങളുടെ കമ്മ്യൂണിറ്റിയിലെ 100 ആളുകളിൽ, എത്രപേർ പുറത്തുപോകുമ്പോൾ ഇനിപ്പറയുന്നവ ചെയ്യുമെന്ന് നിങ്ങൾ കരുതുന്നു?</p>                                         | <p>മാസ്ക് അല്ലെങ്കിൽ മുഖാവരണം ധരിക്കും</p>           |
| MK  | <p>Кои мерки сте ги презеле за да ја спречите заразата со COVID-19 во текот на изминатава седмица?</p>          | <p>Носење заштитна маска или прекривка за лице</p>           | <p>Од 100 луѓе во вашата заедница, според вас, колкумина го прават следново кога излегуваат во јавност?</p>                                                   | <p>Носење заштитна маска или прекривка</p>           |
| MN  | <p>Өнгөрсөн долоо хоногт та коронавируст халдвараас (COVID-19) сэргийлэх ямар арга хэмжээ авсан бэ?</p>         | <p>Нүүрний маск эсвэл халхавч зүүх</p>                       | <p>Танай орон нутгийн 100 хүнээс хэд нь гадуур олон нийтийн газраар явахдаа дараахыг хэрэгжүүлдэг гэж бодож байна вэ?</p>                                     | <p>Нүүрний маск эсвэл халхавч зүүх</p>               |
| MS  | <p>Apakah langkah-langkah yang telah anda ambil untuk mencegah jangkitan COVID-19 dalam seminggu yang lalu?</p> | <p>Memakai topeng muka atau menutup muka</p>                 | <p>Pada pendapat anda daripada 100 orang dalam komuniti anda, berapa ramaikah yang akan melakukan perkara berikut ketika mereka berada di khalayak ramai?</p> | <p>Memakai topeng muka atau menutup muka</p>         |
| NL  | <p>Welke maatregelen heb je in de afgelopen week genomen om besmetting met COVID-19 te voorkomen?</p>           | <p>Een mondkapje of andere bedekking dragen</p>              | <p>Hoeveel van 100 willekeurige mensen in je community doen volgens jou het volgende wanneer ze in het openbaar zijn?</p>                                     | <p>Een mondkapje of andere bedekking dragen</p>      |
| MY  | <p>ယခင်တစ်ပတ်အတွင်း COVID-19 ကူးစက်မှုကို ကာကွယ်ဖို့</p>                                                        | <p>နှာခေါင်းစည်း ဝတ်ဆင်ခြင်း သို့မဟုတ် ဖုံးအုပ်သွားခြင်း</p> | <p>သင်၏ လူမှုအဖွဲ့အစည်းအတွင်းမှ လူများက အများဆိုင်နေရာများကို</p>                                                                                             | <p>နှာခေါင်းစည်းဝတ်သည် သို့မဟုတ် ဖုံးအုပ်သွားသည်</p> |

|       |                                                                                                              |                                                                             |                                                                                                                                                   |                                                                       |
|-------|--------------------------------------------------------------------------------------------------------------|-----------------------------------------------------------------------------|---------------------------------------------------------------------------------------------------------------------------------------------------|-----------------------------------------------------------------------|
|       | သင်ဘာတွေများ<br>ဆောင်ရွက်ဖြစ်ပါသလဲ။                                                                          |                                                                             | သွားလာစဉ်တွင် အောက်ပါတို့ကို<br>လိုက်နာသူဦးရေမှာ ၁၀၀ လျှင်<br>ဘယ်နှစ်ယောက်ရှိမလဲ။                                                                 |                                                                       |
| PA-IN | ਪਿਛਲੇ ਹਫ਼ਤੇ ਤੁਸੀਂ COVID-19 ਦੇ<br>ਇਨਫੈਕਸ਼ਨ ਤੋਂ ਬਚਣ ਲਈ ਕਿਹੜੇ ਉਪਾਅ<br>ਕੀਤੇ ਹਨ?                                  | ਫੇਸ ਮਾਸਕ ਪਹਿਨਣਾ ਜਾਂ ਕੱਪੜੇ ਠਾਲ ਮੂੰਹ<br>ਢਕਣਾ                                  | ਜਦੋਂ ਉਹ ਪਬਲਿਕ ਵਿੱਚ ਬਾਹਰ ਜਾਂਦੇ ਹੋ,<br>ਤਾਂ ਤੁਹਾਨੂੰ ਤੁਹਾਡੇ ਭਾਈਚਾਰੇ ਦੇ 100 ਲੋਕਾਂ<br>ਵਿੱਚੋਂ ਕਿੰਨੇ ਕੁ ਲੋਕ ਹੇਠਾਂ ਲਿਖੀਆਂ ਗੱਲਾਂ ਨੂੰ<br>ਮੰਨਦੇ ਹੋਏ ਦਿਸਦੇ ਹਨ? | ਫੇਸ ਮਾਸਕ ਪਹਿਨਣਾ ਜਾਂ ਕੱਪੜੇ ਠਾਲ ਮੂੰਹ<br>ਢਕਣਾ                            |
| PL    | Jakie działania<br>podejmowałeś(aś), aby zapobiec<br>zakażeniu koronawirusem w<br>ciągu ostatniego tygodnia? | Noszenie maski ochronnej lub<br>osłony                                      | Ile osób na 100 Twoim zdaniem<br>stosuje poniższe środki<br>ostrożności podczas przebywania<br>w miejscach publicznych w<br>Twojej okolicy?       | Noszenie maski ochronnej lub<br>osłony                                |
| PT    | Que medidas tomaste ao longo da<br>última semana para não<br>contraíres a COVID-19?                          | Usar uma máscara de proteção<br>facial ou tapar a cara                      | Em 100 pessoas na tua<br>comunidade, quantas achas que<br>respeitam as seguintes<br>recomendações quando saem em<br>público?                      | Usar uma máscara de proteção<br>facial ou tapar a cara                |
| RO    | Ce măsuri ai luat pentru a<br>preveni infectarea cu coronavirus<br>în ultima săptămână?                      | Am purtat o mască sau un alt<br>obiect pentru a-mi acoperi nasul<br>și gura | Din 100 de persoane din<br>comunitatea ta, câte persoane<br>crezi că fac următoarele când<br>merg în public?                                      | Poartă o mască sau un alt obiect<br>pentru a-și acoperi nasul și gura |
| RU    | Какие меры вы приняли, чтобы<br>предотвратить инфицирование<br>COVID-19 за прошедшую<br>неделю?              | Ношение маски для лица или<br>прикрывание лица                              | Сколько членов вашего<br>сообщества из 100, по вашему<br>мнению, выполняют указанные<br>ниже действия в публичных<br>местах?                      | Носят маску для лица или<br>прикрывают лицо                           |
| SQI   | Çfarë masash ke marrë për të<br>parandaluar infeksionin nga<br>COVID-19 në javën e kaluar?                   | Mbajtja e një maske fytyre ose<br>mbulesë tjetër                            | Nga 100 persona në komunitetin<br>tënd, sa mendon se veprojnë si<br>më poshtë kur dalin në publik?                                                | Mbajnë një maskë fytyre ose<br>mbulesë tjetër                         |
| SW    | Umechukua hatua zipi kuzuia<br>maambukizi ya COVID-19<br>katika wiki iliyopita?                              | Kuvaa barakoa au kitambaa cha<br>kufunika uso                               | Kati ya watu 100 katika jumuiya<br>yako, unafikiri ni wangapi<br>hufanya yafuatayo wanapokuwa<br>kwenye umma?                                     | Kuvaa barakoa au kufunika uso                                         |
| TA    | கடந்த வாரத்தில் COVID-<br>19 நோய்த்தொற்றைத்<br>தடுக்க நீங்கள் என்ன                                           | முகக் கவசம் அணிந்துக்<br>கொள்ளல் அல்லது<br>முகத்தை மறைத்தல்                 | உங்கள் சமூகத்தில்<br>உள்ள 100 பேரில்,<br>எத்தனை பேர் வெளியே                                                                                       | முகக் கவசம் அணிதல்<br>அல்லது முகத்தை<br>மறைத்தல்                      |

|     | நடவடிக்கைகள்<br>எடுத்துள்ளீர்கள்?                                                                                |                                                        | செல்லும்போது<br>பின்வருவனவற்றைச்<br>செய்கிறார்கள் என்று<br>நினைக்கிறீர்கள்?                                                                     |                                                      |
|-----|------------------------------------------------------------------------------------------------------------------|--------------------------------------------------------|-------------------------------------------------------------------------------------------------------------------------------------------------|------------------------------------------------------|
| TEL | గతవారం, మీరు COVID-19<br>ఇన్ఫెక్షన్ సోకకుండా నివారించడం<br>కోసం ఏయే చర్యలు తీసుకున్నారు?                         | ఫేస్ మాస్క్ లాదా వేరే ఏదైనా<br>ధరించడం                 | మీ కమ్యూనిటీలోని ప్రతి 100 మంది<br>వ్యక్తులలో ఎంతమంది బహిరంగ<br>ప్రదేశాలకు వెళ్ళినప్పుడు క్రింది<br>పనులు చేస్తున్నట్లు మీరు<br>భావిస్తున్నారు? | ఫేస్ మాస్క్ లాదా మరేదైనా ధరించడం                     |
| TGL | Anu-anong mga hakbang ang<br>ginawa mo upang maiwasan ang<br>impeksiyon mula sa COVID-19<br>sa nakaraang linggo? | Nagsusuot ng face mask o takip                         | Sa 100 tao sa iyong komunidad,<br>sa tingin mo ilan ang gumagawa<br>ng mga sumusunod kapag<br>lumalabas sila sa publiko?                        | Nagsusuot ng face mask o takip                       |
| TH  | คุณใช้มาตรการใดเพื่อป้องกันการติดเชื้อจากโควิด-19 ในช่วงสัปดาห์ที่ผ่านมา                                         | สวมหน้ากากหรือหน้ากากอนามัย                            | จากกลุ่มคน 100 คนในชุมชนของคุณ<br>คุณคิดว่ามีกี่คนที่ปฏิบัติตามสิ่งต่อไปนี้เมื่ออยู่ในที่สาธารณะ                                                | สวมหน้ากากหรือหน้ากากอนามัย                          |
| TR  | Geçtiğimiz hafta, COVID-19<br>enfeksiyonunu önlemek için<br>hangi önlemleri aldınız?                             | Maske takmak veya başka bir<br>şekilde yüzü örtmek     | İçinde bulunduğunuz<br>topluluktaki her 100 kişiden<br>kaçının kamusal alana çıktığında<br>şunları yaptığınızı<br>düşünüyorsunuz?               | Maske takmak veya başka bir<br>şekilde yüzünü örtmek |
| UK  | Яких заходів ви вживали для<br>запобігання зараженню<br>COVID-19 минулого тижня?                                 | Носіння маски для обличчя або<br>прикриваючої пов'язки | Скільки людей зі 100 у вашій<br>спільноті, на ваш погляд,<br>виконують наведені нижче дії,<br>коли виходять у громадській<br>місця?             | Носять маску або<br>прикриваються                    |
| UR  | آپ نے گذشتہ ہفتے میں کورونا وائرس<br>CoVID-19 انفیکشن سے ہونے والے<br>سے بچنے کیلئے کیا اقدامات اٹھائے ہیں؟      | چہرے کا ماسک پہننا یا ڈھانپنا                          | آپ کے حساب سے، آپ کی کمیونٹی کے<br>100 افراد میں سے کتنے افراد باہر جاتے<br>وقت مندرجہ ذیل کام کرتے ہیں؟                                        | چہرے کا ماسک پہننا یا ڈھانپنا                        |
| VI  | Trong tuần qua bạn đã thực hiện<br>các biện pháp nào để tránh bị<br>nhiễm COVID-19?                              | Đeo khẩu trang hoặc khăn che<br>mặt                    | Bạn nghĩ trong cộng đồng của<br>mình, cứ 100 người thì có bao<br>nhiều người thực hiện những việc<br>sau khi đi ra nơi công cộng?               | Đeo khẩu trang hoặc khăn che<br>mặt                  |



|       |                                                                                 |                                       |                                                                                               |                                       |
|-------|---------------------------------------------------------------------------------|---------------------------------------|-----------------------------------------------------------------------------------------------|---------------------------------------|
| ZH-S  | 在过去一周内，您采取了什么措施来防止自己感染新冠病毒？                                                     | 佩戴口罩或其他遮盖物                            | 在您居住的社区内，您认为每 100 人中有多少人会在外出公共场合时采取以下做法？                                                      | 佩戴口罩或其他遮盖物                            |
| ZH-T  | 在過去一週內，您曾採取哪些措施來預防感染新冠肺炎？                                                       | 佩戴口罩或以物品遮擋臉部                          | 您的社群每 100 人當中，您認為有多少人在前往公共場所時會確實遵守下列事項？                                                       | 佩戴口罩或以物品遮擋臉部                          |
| ES    | ¿Qué medidas tomaste para evitar contagiarte COVID-19 durante la última semana? | Usar mascarilla sanitaria o tapabocas | De 100 personas de tu comunidad, ¿cuántas piensas que hacen lo siguiente en lugares públicos? | Usar mascarilla sanitaria o tapabocas |
| ES-ES | ¿Qué medidas tomaste para evitar contagiarte COVID-19 durante la última semana? | Usar mascarilla sanitaria o tapabocas | De 100 personas de tu comunidad, ¿cuántas piensas que hacen lo siguiente en lugares públicos? | Usar mascarilla sanitaria o tapabocas |

Source: <https://covidsurvey.mit.edu>

### Study S1: Priming Collectivism Can Increase the Willingness to Wear Masks

Our four large-scale survey studies have consistently demonstrated a link between collectivism and mask usage during the COVID-19 pandemic. To explore a potential intervention, we conducted an experiment to examine whether priming people with collectivism could increase their willingness to wear masks. Oyserman and Lee's situated cognition perspective on culture (2) posits that "individuals in all cultures have access to individualist and collectivist cognitive content and that content of either type may be activated through subtle primes" (3). Indeed, a meta-analytic review of studies in different countries found that priming collectivism can produce more collectivistic attitudes and cognitions (4).

#### Method

This study was pre-registered at <https://aspredicted.org/blind.php?x=kf8uj2> and approved by the Institutional Review Board of Massachusetts Institute of Technology (protocol E-2906).

**Participants.** We used G\*Power to determine the sample size for a small-sized effect: A total of 321 participants were required for the study to be powered at 90%. To exceed this requirement, we aimed to recruit 450 qualified participants via the TurkPrime platform (5). Participants qualified for the study only if they were native English speakers born in the United States. As specified in the pre-registration, participants were excluded if they had contracted COVID-19, failed our attention check question, or failed the pronoun-clicking task (see below).

490 participants completed this study (48.2% female; mean age = 40.75 years,  $SD = 13.39$ ). Their educational backgrounds were: 12.5% high school or lower, 25.1% some college, 41.6% bachelor's degree, 20.8% master's degree or above. 79.8% self-identified as Whites, 8.8% Asian, 6.5% Black, 3.3% Latino, and 1.6% other ethnicities. Their political affiliations were: 38.8% Democrat, 19.8% leaning Democrat, 17.1% no political leaning, 13.3% leaning Republican, 11.0% Republican.

**Experimental design and measures.** Participants were randomly assigned to one of three conditions in a between-subjects design: collectivism, individualism, or control condition.

We primed collectivism (vs. individualism) with a pronoun-clicking task developed by Brewer and Gardner (6). This priming manipulation has been validated and used in dozens of past studies (4).

Before indicating their willingness to wear masks, participants in the collectivism and individualism conditions read a short story about a trip to a city and were asked to click on all pronouns. In the collectivism condition, all 20 pronouns were first-person plural: *we*, *us*, *our*, or *ourselves*:

*We* go to the city often. *Our* anticipation fills *us* as *we* see the skyscrapers come into view. *We* allow *ourselves* to explore every corner, never letting an attraction escape *us*. *Our* voice fills the air and street. *We* see all the sights, *we* window shop, and everywhere *we* go *we* see *our* reflection looking back at *us* in the glass of a hundred windows. At nightfall *we* linger, *our* time in the city almost over. When finally *we* must leave, *we* do so knowing that *we* will soon return. The city belongs to *us*.

In the individualism condition, all 20 pronouns were first-person singular: *I*, *me*, *my*, or *myself*:

*I* go to the city often. *My* anticipation fills *me* as *I* see the skyscrapers come into view. *I* allow *myself* to explore every corner, never letting an attraction escape *me*. *My* voice fills the air and street. *I* see all the sights, *I* window shop, and everywhere *I* go *I* see *my* reflection looking back at *me* in the glass of a hundred windows. At nightfall *I* linger, *my*

time in the city almost over. When finally *I* must leave, *I* do so knowing that *I* will soon return. The city belongs to *me*.

Following past research (7), we excluded participants who clicked on fewer than 15 of the 20 pronouns (75%). Results were similar when we used more stringent exclusion criteria.

In the control condition, participants did not complete the pronoun-clicking task. This control condition enabled us to assess participants' baseline willingness to wear masks.

**Willingness to wear masks.** To measure willingness to wear masks, we used the question adapted from Rieger (8): "Suppose it is not mandatory to wear masks during the COVID-19 pandemic. Would you still wear a mask in the following situations?" The five situations were: street, park, office, beach, and university campus (1 = no, 2 = probably no, 3 = unsure, 4 = probably yes, 5 = yes;  $\alpha = .90$ ). The display order of the five situations was randomized.

### Results and Discussion

As hypothesized, participants in the collectivism condition ( $M = 4.01$ ,  $SD = .93$ ) were significantly more willing to wear masks than participants in the individualism condition ( $M = 3.54$ ,  $SD = 1.35$ ;  $t = 3.55$ , two-tailed  $p < .001$ ,  $d = .40$ , 95% CI = [.21, .73]) and the control condition ( $M = 3.78$ ,  $SD = 1.09$ ;  $t = 2.08$ , two-tailed  $p = .039$ ,  $d = .23$ , 95% CI = [.01, .45]). Moreover, participants in the individualism condition were marginally less willing to wear masks than participants in the control condition ( $t = -1.76$ , two-tailed  $p = .08$ ,  $d = -.19$ , 95% CI = [-.51, .03]). Together, these results suggest that priming people with collectivism has the potential to increase their willingness to wear masks during the COVID-19 pandemic.

### References

1. W. Wei, *et al.*, Regional ambient temperature is associated with human personality. *Nat. Hum. Behav.* **1**, 890–895 (2017).
2. D. Oyserman, S. W. S. Lee, "A situated cognition perspective on culture: Effects of priming cultural syndromes on cognition and motivation" in *Handbook of Motivation and Cognition across Cultures*, R. M. Sorrentino, S. Yamaguchi, Eds. (San Diego, CA: Elsevier, 2008), pp. 237–265.
3. D. Sullivan, M. J. Landau, A. C. Kay, Z. K. Rothschild, Collectivism and the meaning of suffering. *J. Pers. Soc. Psychol.* **103**, 1023–1039 (2012).
4. D. Oyserman, S. W. S. Lee, Does culture influence what and how we think? Effects of priming individualism and collectivism. *Psychol. Bull.* **134**, 311–342 (2008).
5. L. Litman, J. Robinson, T. Abberbock, TurkPrime.com: A versatile crowdsourcing data acquisition platform for the behavioral sciences. *Behav. Res. Methods* **49**, 433–442 (2017).
6. M. B. Brewer, W. Gardner, Who Is This "We"? Levels of Collective Identity and Self Representations. *J. Pers. Soc. Psychol.* **71**, 83–93 (1996).
7. I. Grossmann, N. Jowhari, Cognition and the self: Attempt of an independent close replication of the effects of self-construal priming on spatial memory recall. *J. Exp. Soc. Psychol.* **74**, 65–73 (2018).
8. M. Rieger, To wear or not to wear? Factors influencing wearing face masks in Germany during the COVID-19 pandemic. *Soc. Heal. Behav.* (2020).
